# Supplementary material
Source: Springer Nature journal article supplement (https://www.springermedizin.de/resource/supplementary/12891_2013_2014_MOESM4_ESM.pdf/9509790)

**WT AIA**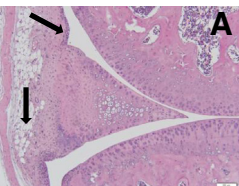**TG AIA**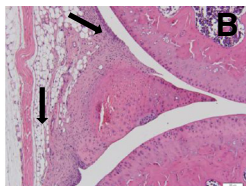**WT CTR**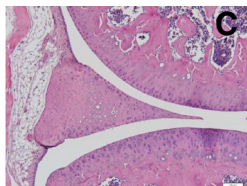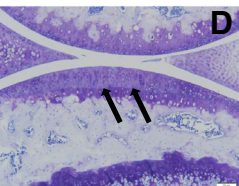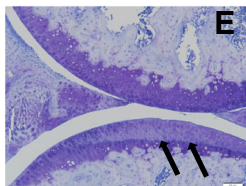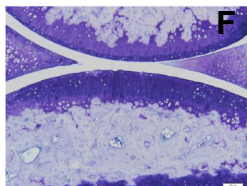**G**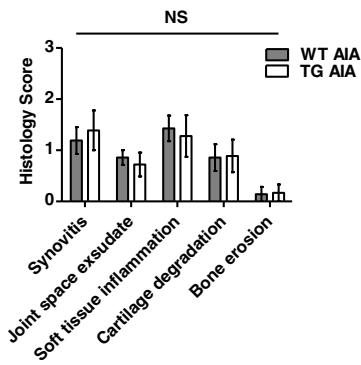**H**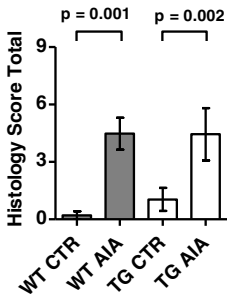

Supplement: MOESM4 [file 9509790]
